# Supplementary material for: Solution properties and electrospinning of phosphonium gemini surfactants
Source: Royal Society of Chemistry journal article supplement (doi:10.1039/c4sm00271g), 2014-01-01
Supplement: c4sm00271g1.pdf [file c4sm00271g1.pdf]

## Supporting Information for Solution Properties and Electrospinning of Phosphonium Gemini Surfactants

Sean T. Hemp, Amanda G. Hudson, Michael H. Allen, Jr., Sandeep S. Pole, Robert B. Moore,  
and Timothy E. Long\*

*Macromolecules and Interfaces Institute, Department of Chemistry, Virginia Tech, Blacksburg,  
VA 24061*

\*To whom correspondence should be addressed. E-mail: [telong@vt.edu](mailto:telong@vt.edu). TEL: (540)231-2480  
FAX: (540)231-8517

Keywords: phosphonium, gemini surfactants, solution rheology, electrospinning

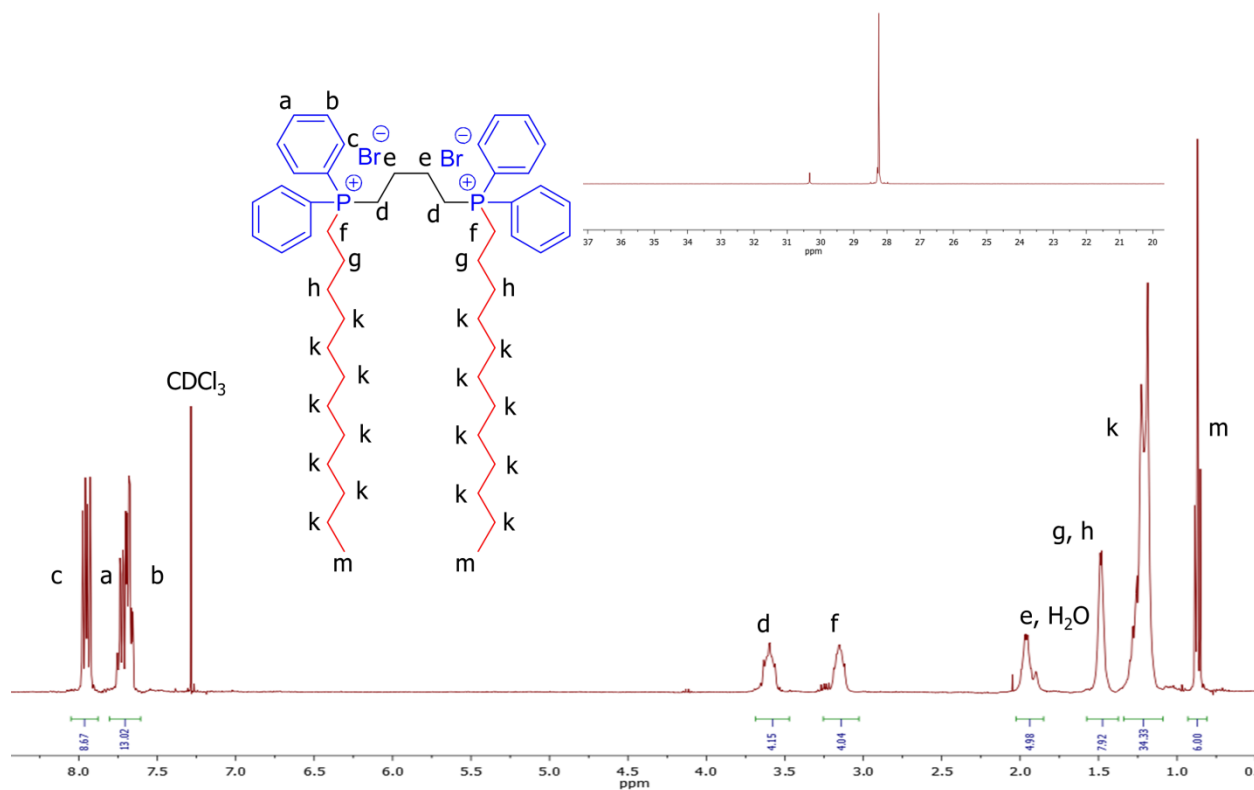

**Figure S1.**  $^1\text{H}$  and  $^{31}\text{P}$  NMR spectroscopy of 12-4-12P phosphonium gemini surfactant.

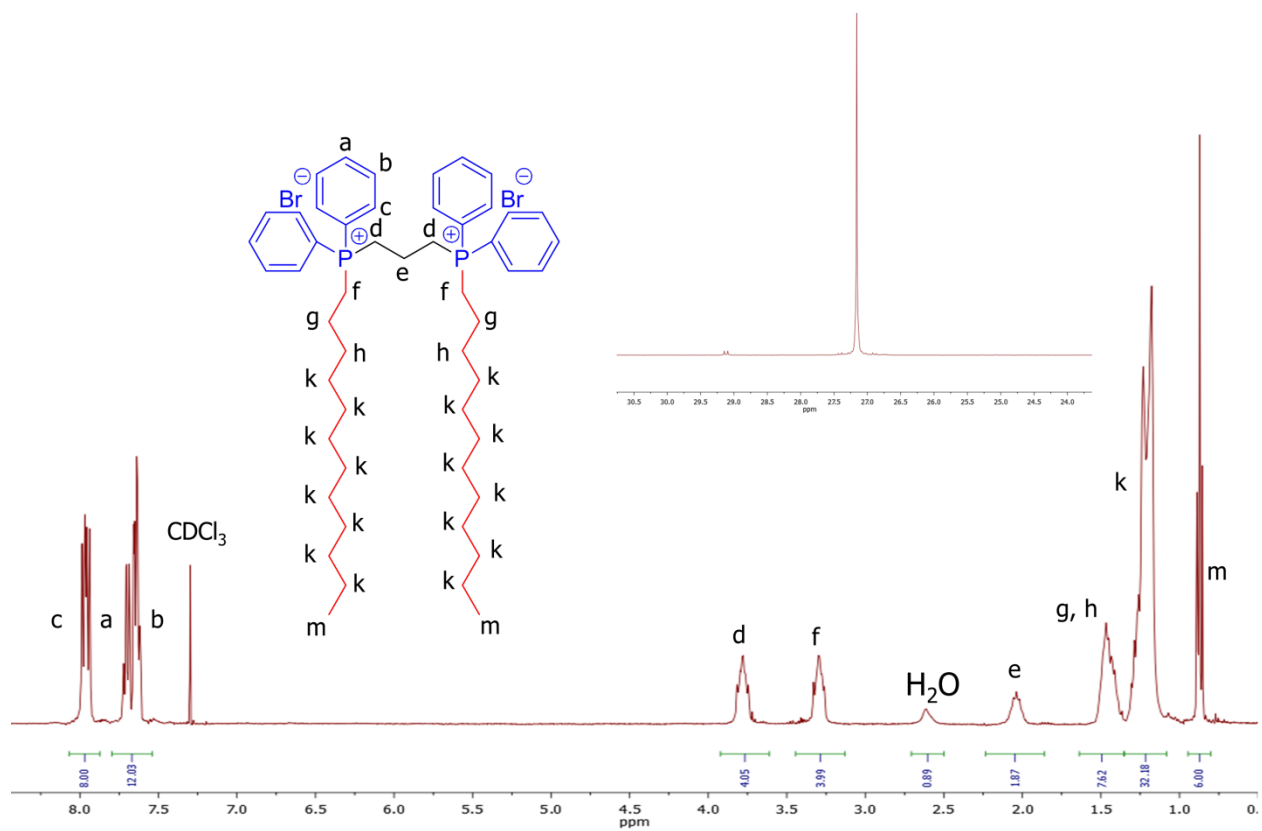

**Figure S2.**  $^1\text{H}$  and  $^{31}\text{P}$  NMR spectroscopy of 12-3-12P phosphonium gemini surfactant.

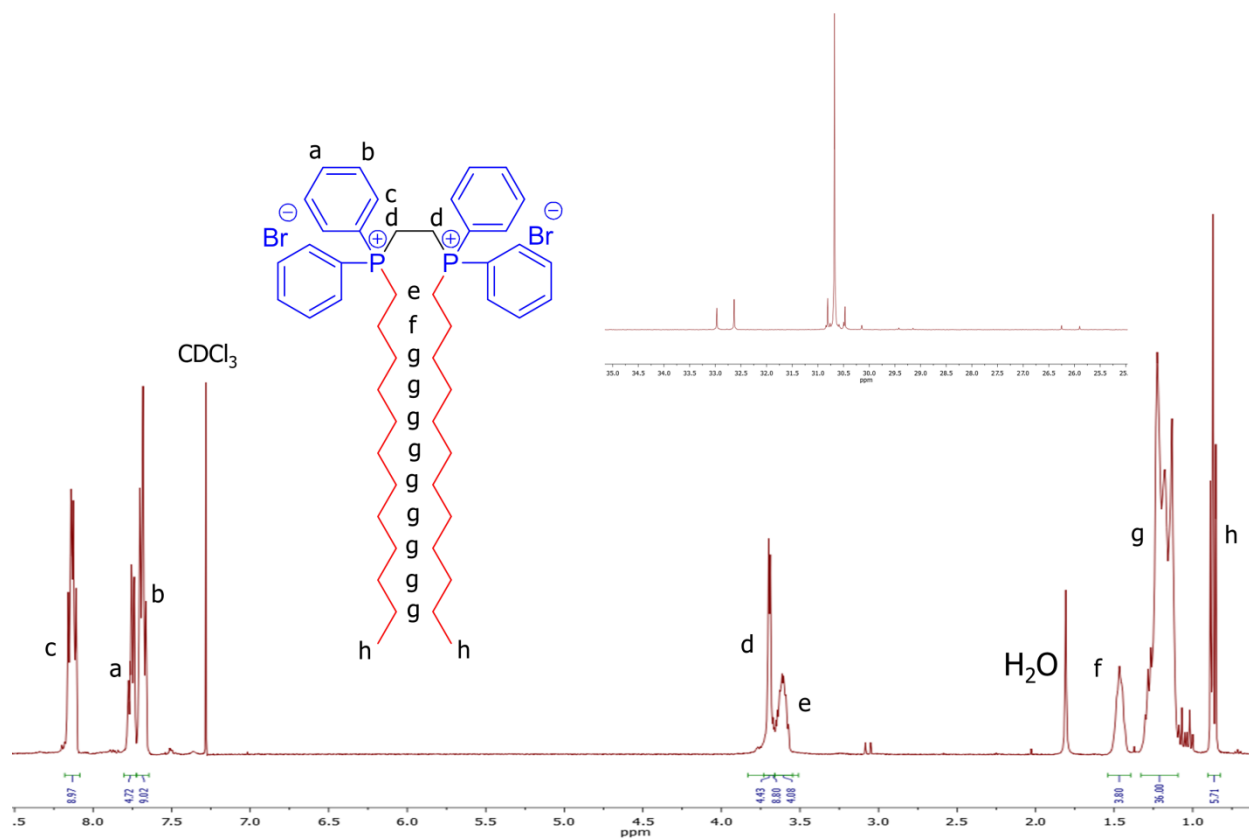

**Figure S3.**  $^1\text{H}$  and  $^{31}\text{P}$  NMR spectroscopy of 12-2-12P phosphonium gemini surfactant.
